# Supplementary material
Source: publisher figshare collection journal article supplement (https://sage.figshare.com/ndownloader/files/17961581)
Supplement: Supplementary file 1 [file 17961581]

## Appendix A Pre-intervention scores of outcome measures (intention-to-treat)

| Outcome measures                                | Intervention<br>group ( $n = 107$ )<br>mean ( $SD$ ) | Control group<br>( $n = 111$ )<br>mean ( $SD$ ) | Baseline comparison<br>$p$ |
|-------------------------------------------------|------------------------------------------------------|-------------------------------------------------|----------------------------|
| ECBI-Intensity                                  | 132.14 (25.86)                                       | 131.59 (22.86)                                  | $p = 0.869$                |
| ECBI-Problem                                    | 12.00 (7.83)                                         | 11.82 (7.95)                                    | $p = 0.869$                |
| Task Motivation                                 | 7.92 (2.37)                                          | 7.95 (2.62)                                     | $p = 0.929$                |
| School Readiness                                | 10.26 (2.82)                                         | 9.95 (3.07)                                     | $p = 0.430$                |
| Academic Competence                             | 26.80 (6.69)                                         | 26.56 (7.32)                                    | $p = 0.797$                |
| Effort Motivation                               | 13.11 (3.93)                                         | 12.34 (5.59)                                    | $p = 0.185$                |
| HKCAS-P Cognition<br>raw scores                 | 8.58 (5.31)                                          | 9.03 (5.75)                                     | $p = 0.549$                |
| HKCAS-P Cognition<br>scaled scores              | 6.42 (3.02)                                          | 6.39 (2.80)                                     | $p = 0.953$                |
| Total number of words <sup>a</sup>              | 187.23 (159.73)                                      | 180.61 (168.14)                                 | $p = 0.774$                |
| Total number of<br>different words <sup>a</sup> | 67.53 (41.13)                                        | 64.83 (42.80)                                   | $p = 0.649$                |
| Total number of<br>utterances <sup>a</sup>      | 97.50 (68.16)                                        | 97.13 (74.89)                                   | $p = 0.971$                |
| Mean length of<br>utterances <sup>a</sup>       | 1.82 (0.58)                                          | 1.72 (0.62)                                     | $p = 0.243$                |
| HK-PFMDA Rasch<br>score                         | 67.60 (6.04)                                         | 68.20 (5.96)                                    | $p = 0.461$                |
| Movement ABC-2 total                            | 56.03 (17.74)                                        | 54.74 (16.60)                                   | $p = 0.580$                |

---

score

---

|                        |               |               |             |
|------------------------|---------------|---------------|-------------|
| Parenting Stress Index | 99.26 (20.13) | 97.97 (17.30) | $p = 0.612$ |
|------------------------|---------------|---------------|-------------|

---

|                    |              |              |             |
|--------------------|--------------|--------------|-------------|
| Parenting Sense of | 57.35 (8.34) | 57.86 (7.65) | $p = 0.632$ |
|--------------------|--------------|--------------|-------------|

---

Competence

---

<sup>a</sup> Intervention ( $n = 100$ ), control ( $n = 102$ )

**Appendix B Post-intervention scores of outcome measures (intention-to-treat)**

| Outcome measures                                | Intervention group<br>( <i>n</i> = 107)<br>mean ( <i>SD</i> ) | Control group<br>( <i>n</i> = 111)<br>mean ( <i>SD</i> ) | Effect size<br>(Cohen's <i>d</i> ) and<br>95% CI                     |
|-------------------------------------------------|---------------------------------------------------------------|----------------------------------------------------------|----------------------------------------------------------------------|
| ECBI-Intensity                                  | 125.55 (26.92)                                                | 128.38 (26.49)                                           | 0.13 [-0.14, 0.39] <sup>a</sup><br>0.11 [-0.16, 0.37] <sup>b</sup>   |
| ECBI-Problem                                    | 8.60 (7.19)                                                   | 9.81 (8.26)                                              | 0.22 [-0.05, 0.49] <sup>a</sup><br>0.16 [-0.11, 0.42] <sup>b</sup>   |
| Task Motivation                                 | 9.12 (2.24)                                                   | 8.47 (2.48)                                              | 0.61[0.33, 0.87] <sup>a</sup><br>0.27 [0.00, 0.54] <sup>b</sup>      |
| School Readiness                                | 11.94 (2.84)                                                  | 11.70 (2.96)                                             | 0.14 [-0.13, 0.40] <sup>a</sup><br>0.08 [-0.18, 0.35] <sup>b</sup>   |
| Academic Competence                             | 28.80 (6.74)                                                  | 28.92 (6.86)                                             | -0.02 [-0.29, 0.24] <sup>a</sup><br>-0.02 [-0.28, 0.25] <sup>b</sup> |
| Effort Motivation                               | 14.26 (3.93)                                                  | 13.92 (4.42)                                             | 0.15 [-0.12, 0.41] <sup>a</sup><br>0.08 [-0.19, 0.35] <sup>b</sup>   |
| HKCAS-P Cognition<br>raw scores                 | 15.17 (6.74)                                                  | 14.96 (6.78)                                             | 0.05 [-0.22, 0.31] <sup>a</sup><br>0.03 [-0.23, 0.30] <sup>b</sup>   |
| HKCAS-P Cognition<br>scaled scores              | 8.13 (3.16)                                                   | 7.59 (3.32)                                              | 0.34 [0.00, 0.67] <sup>a</sup><br>0.17 [-0.11, 0.43] <sup>b</sup>    |
| Total number of words <sup>c</sup>              | 418.70 (354.26)                                               | 368.68 (353.61)                                          | 0.46 [0.17, 0.73] <sup>a</sup><br>0.14 [-0.14, 0.42] <sup>b</sup>    |
| Total number of<br>different words <sup>c</sup> | 116.67 (72.48)                                                | 114.24 (77.35)                                           | 0.08 [-0.20, 0.35] <sup>a</sup><br>0.03 [-0.24, 0.31] <sup>b</sup>   |
| Total number of                                 | 189.63 (181.84)                                               | 187.22 (183.40)                                          | 0.08 [-0.20, 0.35] <sup>a</sup>                                      |

|                         |               |               |                                  |
|-------------------------|---------------|---------------|----------------------------------|
| utterances <sup>c</sup> |               |               | 0.01 [-0.26, 0.29] <sup>b</sup>  |
| Mean length of          | 2.51 (1.00)   | 2.37 (1.07)   | 0.26 [-0.02, 0.53] <sup>a</sup>  |
| utterances <sup>c</sup> |               |               | 0.14 [-0.14, 0.41] <sup>b</sup>  |
| HK-PFMDA Rasch          | 73.43 (5.75)  | 74.27 (5.72)  | -0.16 [-0.42, 0.11] <sup>a</sup> |
| score                   |               |               | -0.15 [-0.41, 0.12] <sup>b</sup> |
| Movement ABC-2 total    | 64.17 (15.54) | 65.34 (16.5)  | -0.12 [-0.38, 0.15] <sup>a</sup> |
| score                   |               |               | -0.07 [-0.34, 0.19] <sup>b</sup> |
| Parenting Stress Index  | 92.72 (20.59) | 94.54 (19.48) | 0.13 [-0.14, 0.40] <sup>a</sup>  |
|                         |               |               | 0.09 [-0.18, 0.36] <sup>b</sup>  |
| Parenting Sense of      | 59.68 (8.99)  | 58.63 (8.17)  | 0.24 [-0.03, 0.50] <sup>a</sup>  |
| Competence              |               |               | 0.12 [-0.15, 0.39] <sup>b</sup>  |

<sup>a</sup> Adjusted; <sup>b</sup> Unadjusted; <sup>c</sup> Intervention ( $n = 100$ ), control ( $n = 102$ )

**Appendix C Changes in clinical status (Intention-to-treat analysis based on pooled multiple imputation results)**

|                                             | Intervention group                          |                                             | Control group                               |                                             |
|---------------------------------------------|---------------------------------------------|---------------------------------------------|---------------------------------------------|---------------------------------------------|
|                                             | ECBI-Intensity                              |                                             |                                             |                                             |
|                                             | Below clinical cut-off at pre-intervention  | Above clinical cut-off at pre-intervention  | Below clinical cut-off at pre-intervention  | Above clinical cut-off at pre-intervention  |
| Below clinical cut-off at post-intervention | 43.4 (40.7%)                                | <b>18.0 (16.9%)</b>                         | 55.8 (50.4%)                                | <b>10.4 (9.4%)</b>                          |
| Above clinical cut-off at post-intervention | 4.6 (4.3%)                                  | 40.6 (38.1%)                                | 8.0 (7.2%)                                  | 36.6 (33.0%)                                |
| McNemar test result                         | $p = 0.011 - .0004$                         |                                             | $p = 1.00 - 0.359$                          |                                             |
|                                             | ECBI-Problem                                |                                             |                                             |                                             |
|                                             | Below clinical cut-off at post-intervention | Above clinical cut-off at post-intervention | Below clinical cut-off at post-intervention | Above clinical cut-off at post-intervention |
| Below clinical cut-off at post-intervention | 72 (67.9%)                                  | <b>13.4 (12.6%)</b>                         | 65.8 (59.5%)                                | <b>17 (15.4%)</b>                           |
| Above clinical cut-off at post-intervention | 2.8 (2.6%)                                  | 17.8 (16.8%)                                | 7 (6.3%)                                    | 20.8 (18.8%)                                |
| McNemar test result                         | $p = 0.035 - 0.008$                         |                                             | $p = 0.093 - 0.043$                         |                                             |
|                                             | HKCAS-P Cognition                           |                                             |                                             |                                             |
|                                             | Average or above at pre-intervention        | Below average at pre-intervention           | Average or above at pre-intervention        | Below average at pre-intervention           |
|                                             |                                             |                                             |                                             |                                             |

|                                          |                     |                   |                     |                     |
|------------------------------------------|---------------------|-------------------|---------------------|---------------------|
| Average or above at<br>post-intervention | 28 (41.8%)          | <b>17 (25.4%)</b> | 28 (38.9%)          | <b>12.2 (16.9%)</b> |
| Below average at<br>post-intervention    | 5 (7.5%)            | 17 (25.4%)        | 6 (8.3%)            | 25.8 (35.8%)        |
| McNemar test result                      | $p = 0.041 - 0.004$ |                   | $p = 0.481 - .0064$ |                     |
